1 **Current approaches in livestock geotagging: Assessing available technologies and**  
2 **applications to public health research**

3 **Authors:** Julianne Meisner<sup>a</sup>, Boku Bodha<sup>b</sup>, J. Russell Stothard<sup>c</sup>, Alexandra Juhasz<sup>c,d</sup>, Peter  
4 Makaula<sup>e</sup>, Janelisa Musaya<sup>e</sup>, Isaac Ngere<sup>f,g</sup>, John Gachohi<sup>f</sup>, M. Kariuki Njenga<sup>f,g</sup>, Dismas  
5 Oketch<sup>f,h</sup>, Waiguru Muriuki<sup>f</sup>, Eric Osoro<sup>f,g</sup>

6 <sup>a</sup>Department of Global Health, Department of Epidemiology, University of Washington, Seattle,  
7 WA USA

8 <sup>b</sup>Department of Veterinary Services, Marsabit County – Kenya

9 <sup>c</sup>Tropical Disease Biology, Liverpool School of Tropical Medicine, Liverpool, L3 5QA, UK

10 <sup>d</sup>Institute of Medical Microbiology, Semmelweis University, H-1089 Budapest, Hungary

11 <sup>e</sup>Malawi Liverpool Wellcome Trust Programme of Clinical Tropical Research, Blantyre, Malawi

12 <sup>f</sup>Washington State University Global Health – Kenya, Nairobi, Kenya

13 <sup>g</sup>Paul G. Allen School for Global Health, Washington State University, Pullman, USA.

14 <sup>h</sup>University of Nairobi, College of Health Sciences, Department of Medical Microbiology

15 **ABSTRACT**

16 Livestock geotrackers are increasingly used for public health research, particularly within the field  
17 of One Health, to draw inference on pathogen exposure and human risk from livestock movement  
18 data. There are many dozens, if not hundreds, of devices available to researchers, including  
19 devices purpose built for livestock such as collars, ear tags, rumen boluses, or other formats;  
20 those intended for wildlife but suitable for livestock; and devices intended for other geotracking  
21 applications which can be retrofitted for livestock. To assist other researchers in navigating the  
22 wealth of available options, we present here our experiences with six devices—four intended for

23 livestock, one intended for wildlife, and one intended for humans— each applied to cattle, camels,  
24 sheep, goats, and donkeys. We summarize the technical specifications and features of these  
25 devices, our deployment strategies, and our experiences in terms of battery life, durability, data  
26 quality and retrieval, and acceptability by livestock owners.

## 27 **INTRODUCTION**

28 Satellite-based Global Positioning System (GPS) technology has been available to civilians since  
29 the 90s. Due to decreasing cost and increasing functionality, uptake of GPS technology is almost  
30 ubiquitous use today. Concurrent increase in computing power and adoption of so-called “Big  
31 Data” approaches to scientific research across a range of disciplines has led to widespread use  
32 of GPS technology to track livestock movements using wearable devices such as collars, ear  
33 tags, and rumen boluses. Ecologists use such methods to track spatiotemporal patterns of  
34 resource use and behavioral responses to environmental features, allowing resulting ecosystem  
35 impacts and species interactions to be modeled (1,2). In agricultural research, GPS devices are  
36 central to precision farming programs in industrialized systems, and are used to characterize the  
37 movements of transhumant and nomadic pastoralists in extensive systems (3).

38

39 In public health, livestock movements play a pivotal role in the epidemiology of various zoonotic  
40 diseases. For example, the role of livestock movement in the spread of Rift Valley fever (4) and  
41 *Taenia solium* (5) highlights the important connections between livestock mobility and the spread  
42 of infectious diseases. Epidemiologists have used livestock movement data to infer exposure to  
43 pathogens by coupling movement data with data on vector distributions (6) and human  
44 movements (7), and combining movement livestock and wildlife movement data to model wildlife-  
45 livestock contact networks (8). An understanding of the dynamic relationships between livestock  
46 movement and pathogen transmission is necessary for implementation of effective public health

47 interventions and disease control strategies, and the integration of GPS tracking with Geographic  
48 Information Systems (GIS) has allowed for enhanced data analysis and informed decision-  
49 making.

50 Livestock geotagging has evolved markedly over the past decades. From rudimentary tagging  
51 systems to sophisticated GPS-based technologies, these advancements have transformed how  
52 livestock movements are monitored and analyzed (9). Researchers interested in using GPS  
53 devices now have a range of products to choose from, which have trade-offs in terms of cost,  
54 durability, weight, battery life, accuracy, data richness (variables collected), data storage, network  
55 coverage, and frequency of fixes, which itself has trade-offs with battery life. Users can purchase  
56 purpose-built products intended for wildlife or livestock tracking; retrofit products intended for  
57 recreation or asset tracking by attaching them to collars, with or without external battery packs;  
58 or custom build dataloggers using pre-assembled boards and open-access platforms such as  
59 Arduino (10).

60 Despite technological advancements, several challenges remain in effective livestock tracking.  
61 These include the cost of deploying GPS devices, their durability under different environmental  
62 conditions, and concerns related to data privacy and security. Additionally, the effectiveness of  
63 these technologies is often limited in specific contexts, such as dense forests, savannah, or  
64 remote regions, posing significant hurdles in data accuracy and reliability. Existing literature  
65 provides limited insights into the comparative performance of different GPS devices in diverse  
66 geographical settings.

67 Because the options for livestock GPS tracking are changing so rapidly, there is a need to  
68 periodically update the literature on available options and their trade-offs. We present here our  
69 collective experience using livestock GPS devices for public health, across three research  
70 projects conducted in pastoralist communities in Kenya, and subsistence livestock-keeping  
71 communities in Malawi from 2022 to 2023. The objective of this study is to evaluate and compare

72 the performance and suitability of various GPS devices for livestock geotagging in these settings.  
73 By focusing on these specific geographical areas and a range of technological solutions, the study  
74 aims to provide actionable insights for optimizing livestock tracking in similar contexts. Across all  
75 three projects, a total of six commercially available devices were used: one device primarily  
76 manufactured for wildlife tracking, four devices manufactured for livestock security on ranches,  
77 and one device manufactured to monitor the safety of adults with dementia. We present  
78 specifications for each device; our protocols for their deployment; and our experience with each  
79 device type, including functionality, durability, and community acceptability.

## 80 **METHODS**

### 81 **Study 1: human-animal contact networks in Marsabit, Kenya.**

#### 82 **Background and setting**

83 Authors Julianne Meisner and Boku Bodha are the lead investigators on a study of human-animal  
84 contact networks in northern Kenya. Study communities include one agropastoralist Rendille  
85 community near Marsabit town, and two pastoralist communities in Marsabit county: one Borana,  
86 and one Gabra. These communities rear cattle, sheep, goats, donkeys and camels, separately in  
87 fora and home herds.

88 Data collection was conducted from December 2022 – July 2023. The onset of data collection  
89 coincided with the end of a three-year long drought in Marsabit during which many livestock were  
90 lost, resulting in marked reductions in herd size. At the time of data collection, mean herd sizes  
91 were 7.65 camels (range 0-60), 7.65 cattle (range 0-29), and 30.71 sheep and goats (range 0-  
92 147). When the drought broke in late March, heavy rains and flooding occurred in the county and  
93 dramatically altered livestock movements.

#### 94 **Sampling strategy**

95 We used a network-based sampling strategy called ego-centric sampling, whereby initially-  
96 selected households (“egos”) are asked to name other households whose herds contact their own  
97 via shared water, grazing, husbandry, or breeding (“alters”). For this pilot study, we sampled one  
98 ego household and up to four alter households in each community, leading to a final sample of  
99 15 households.

100 As our goal was to pilot both devices and methods for measuring human-animal contact, our  
101 deployment strategy oversampled ego herds so that we could use the generated data to simulate  
102 subsampling, and ultimately examine the number of animals per herd that should be tracked to  
103 minimize bias. We similarly oversampled the fora herd as the animals in this herd do not cluster  
104 as tightly as those in the home herd. Our strategy was as follows:

- 105 • Ego households: 24 devices divided evenly between camels, cattle, and sheep/goats. If  
106 the household keeps both a fora and home herd, 2/3rds of the devices should be placed  
107 in the fora herd, and the remaining 1/3<sup>rd</sup> in the home herd.
- 108 • Alter households: 6 devices in total, divided evenly between camels, cattle, and  
109 sheep/goats, and the fora and home herds. If the household keeps a separate home and  
110 fora herd, and each herd includes members of each species group (camels, cattle,  
111 sheep/goats), then one device would be placed per species group in each herd.

112 Decisions regarding the duration of GPS tracking are guided by the total number of devices  
113 available (i.e., budget), battery life, and study logistics. There is a tradeoff between using a GPS  
114 device to track a single animal for a longer period of time, vs. several animals “sharing” that device  
115 by removing and re-deploying it. The choice between these two strategies should be guided by  
116 the research question and study logistics: study duration, labor required to remove and re-deploy  
117 devices, etc. Ultimately, for this study we opted to track livestock for four weeks, remove, and re-  
118 deploy on the next ego network. This fit with our goal of tracking a large number of animals in

119 each ego herd (which necessitated re-use of devices), and the five months available for data  
 120 collection for this pilot project.

121 **GPS devices**

122 This study piloted three types of livestock GPS devices, summarized in Table 1: FindMy,  
 123 Digitalimal, and FarmRanger.

124 Table 1: GPS devices used in Study 1

|                           | <i>FindMy</i>                | <i>Digitalimal</i>                           | <i>FarmRanger</i>                                                  |
|---------------------------|------------------------------|----------------------------------------------|--------------------------------------------------------------------|
| <b>Country of origin</b>  | Norway                       | Spain                                        | South Africa                                                       |
| <b>Networks</b>           | Mobile phone,<br>satellite   | GSM, SigFox                                  | GPRS                                                               |
| <b>App</b>                | iOS; Android soon            | iOS or Android                               | iOS or Android                                                     |
| <b>Subscription costs</b> | Per fix                      | First year included                          | Billed monthly                                                     |
| <b>Weight</b>             | 200gm                        | 265gm                                        | 226gm                                                              |
| <b>Size</b>               | 75mm x 60mm x<br>55mm        | 104mm x 76mm x<br>48mm                       | 120mm x 60mm x<br>45mm                                             |
| <b>Collar material</b>    | Flexible plastic             | Woven canvas                                 | Woven canvas                                                       |
| <b>Battery life</b>       | 2000+ messages               | 1-1.5 years for SigFox<br>6-7 months for GSM | 5-6 months with<br>standard use, 3<br>months with hourly<br>alerts |
| <b>Battery</b>            | Sourced from<br>manufacturer | Sourced from<br>manufacturer                 | Rechargeable, cable<br>included                                    |
| <b>Number tested</b>      | 18                           | 20 (10 GSM, 10<br>SigFox)                    | 10                                                                 |

125

126 FindMy (<https://findmy.no/en/agtech>), based in Norway, produces e-bells for sheep, cattle,  
127 reindeer, camels, horses, and goats. Flexible plastic collars are sized to species, however the  
128 devices are interchangeable. Models are available which use satellite networks, mobile networks,  
129 or both. Service costs are available as subscription programs, or pay-as-you go message plans.  
130 Locations, battery status, inactivity alarms, distress alerts, and mortality events can be viewed in  
131 real time on a mobile app. Users can also use the app to customize preferences including  
132 message plan schedules and geofences. Batteries last over 2,000 fixes, but need to be purchased  
133 from the supplier.

134 Digitanimal (<https://digitanimal.com/?lang=en>), based in Spain, produces GPS devices for  
135 livestock. Woven canvas collars use counterweights to keep devices in the correct position on the  
136 left side of the neck. Large and small canvas collar sizes are available to fit small and large  
137 ruminants, however the devices and weights are interchangeable. Devices can be purchased for  
138 GSM (mobile) or SigFox (satellite) networks. Device costs include a one year subscription service  
139 for fixes every 30 minutes. Users can use a mobile phone app to customize a geofence and view  
140 temperature (current, weekly, and current pack), distance (current, weekly, and current pack),  
141 activity, and location history. Users can also customize alerts such as activity, loss or theft,  
142 temperature, exit from or entrance into a geofence, etc. Batteries last one to 1.5 years for SigFox  
143 and 6-7 months for GSM, but need to be purchased from the supplier.

144 FarmRanger (<https://farmranger.co.za/>), based in South Africa, manufactures GPS devices for  
145 cattle, sheep, goats, horses, and other animals for security purposes. Devices use mobile  
146 networks (GPRS), and subscription costs are billed monthly per device. Alerts are triggered if  
147 animals are stolen or attacked, or the device is removed or tampered with. Both the woven canvas  
148 collar and the setting of the GPS device is customized to animal species: if the device will be  
149 moved from cattle to sheep, the technical team must be alerted so the sensitivity can be adjusted.

150 Sensitivity also changes between field and kraal/fora. Batteries last 5-6 months in standard  
151 functioning, where fixes occur every 30 seconds while in alarm mode, and the unit shuts off  
152 otherwise to conserve battery life. With hourly fixes, batteries are estimated to last 3 months. If  
153 sensitivity settings are incorrect, alarms will be triggered erroneously and battery life will be  
154 reduced. Batteries can be recharged using the provided USB Micro-B charger. No geofencing  
155 function is offered, only abnormal movements.

### 156 **GPS fix rate**

157 The fix rate we selected was ultimately influenced by study goals, available budget, and  
158 functionality of the devices we selected. In general, as fix rate frequency decreases (or errors  
159 increase), modeling and/or assumptions are required to infer contact events from GPS data.  
160 Generally speaking, for GPS data (c.f., other technologies such as proximity loggers), contact is  
161 defined by the occurrence of one or more fixes within a spatiotemporal envelope. For direct  
162 contact, this envelope is very small, corresponding to co-occurrence in the same space and time,  
163 and generally only allows for errors in positional accuracy and acquisition delays. For indirect  
164 contact, this envelope can be larger, corresponding to environmental persistence or dissemination  
165 (e.g., for pathogens with a free-living life stage).

166 Because livestock behavior is fairly predictable and easily observed compared with carnivores or  
167 wildlife, we expect relatively infrequent fix rates are sufficient to capture indirect contact. Livestock  
168 movements are characterized by diurnal rhythms—towards pasture and water in the morning and  
169 shelter in the evening—and influenced but not entirely determined by human keepers. We set fix  
170 rates to be every 30 minutes for the FarmRanger and Digitanimal devices, and five times per day  
171 for the FindMy devices: 01:00, 07:00, 10:00, 15:00, 19:00.

### 172 **Study 2: Role of camels and other livestock in the transmission of *Brucella* and Middle** 173 **East respiratory syndrome coronavirus to humans; Marsabit and Kajiado counties, Kenya.**



174 **Background and setting**

175 The goal of the study is to use animal movement data to define the interactions between livestock  
176 herds that facilitate disease transmission, among pastoralist communities in Marsabit and Kajiado  
177 counties in Kenya. Author Eric Osoro is the lead investigator, collaborating with authors Kariuki  
178 Njenga, Isaac Ngere, John Gachohi, Dismas Oketchf, and Waiguru Muriuki.

179 Marsabit County, situated in Kenya's arid northern region, is the home to many nomadic  
180 pastoralist communities, primarily the Gabra, Borana, and Rendille tribes. These communities  
181 heavily depend on their livestock (camels, cattle, sheep, and goats) for sustenance and economic  
182 stability. Conversely, Kajiado County, located in the semi-arid rangeland to the south of the  
183 country, is predominantly inhabited by the Maasai nomadic pastoralist community, who keep  
184 cattle, goats, and sheep.

185 Study 2 is a longitudinal cohort study conducted over 12-18 months, with data collection on human  
186 participants and their livestock every three months. Throughout the study's duration, enrolled  
187 households receive visits at three-month intervals. Data collection began in December 2022 and  
188 is currently ongoing.

189 **Sampling strategy**

190 It is common practice in these communities for animals to be herded communally within specific  
191 geographical areas. In addition, distinct herding methods for camels, bovines, and sheep and  
192 goats result in varying movement patterns. Consequently, in consultation with community  
193 leaders, we took deliberate measures to select herds that were representative of movements for  
194 each species within their respective villages. We then attached a GPS collar to one animal within  
195 each identified herd, for all villages in our study area until each village had a GPS logger affixed  
196 to a representative member of each species group.

197 Once an animal received a collar, we kept it on that animal for the entire duration of the study.  
 198 However, in cases where an animal was lost or sold, the collar could be transferred to another  
 199 animal of the same species within the herd. Between May and July of 2023 we deployed a total  
 200 of 81 GPS loggers across the two study sites: 20 Savannah GPS loggers applied to cattle and  
 201 camels, and the remaining 61 CatLog2 GPS loggers distributed among all four livestock species  
 202 under investigation.

203 **GPS devices**

204 This study tested two types of livestock GPS devices, summarized in Table 2: CatLog2 GPS  
 205 logger, and Savannah GPS logger.

206 Table 2: GPS devices used in Study 2

|                           | <i>CatLog2 GPS Logger</i>                                                    | <i>Savannah Tracker</i>                      |
|---------------------------|------------------------------------------------------------------------------|----------------------------------------------|
| <b>Country of origin</b>  | USA                                                                          | Kenya                                        |
| <b>Networks</b>           | N/A                                                                          | Iridium Satellite                            |
| <b>App</b>                | Logger specific software                                                     | Logger specific software                     |
| <b>Subscription costs</b> | None                                                                         | Yes, based on data use                       |
| <b>Weight</b>             | 100gm and 240gm                                                              | 375-550gm                                    |
| <b>Collar material</b>    | None provided                                                                | Canvas                                       |
| <b>Battery life</b>       | Small: 371 days @ 30 min fixes (4Ah)<br>Large: 834 days @ 30 min fixes (9Ah) | 1D battery 1 years @ 48<br>positions per day |
| <b>Battery</b>            | Rechargeable                                                                 | Sourced from<br>manufacturer                 |
| <b>Number tested</b>      | 61                                                                           | 20                                           |

207

208 The CatLog2 GPS logger, (<http://www.mr-lee.com/catlog.htm>), is housed within a tubular  
209 structure that combines a rechargeable battery and the GPS receiver. A collar or other means of  
210 affixing the device to an animal must be customized. The GPS logger does not have GSM or  
211 satellite connection capabilities for data transmission, necessitating manual retrieval of data by  
212 removing the device from the collar. During data retrieval, a charged battery can replace a  
213 depleted one, extending the duration of data collection. The data are downloaded using CatLog  
214 GPS Call Center v.4.1 software, and exported as a .csv file. Data fields includes date, time,  
215 position (longitude, latitude, and altitude), temperature, height, and speed (in meters per second).  
216 We deployed two types of devices which differed by battery size. For larger animals (cattle and  
217 camels) we used the 9Ah battery variant, while for smaller animals (sheep and goats) we deployed  
218 a lighter device with a 4Ah battery. We secured the devices to animals using a leather collar—  
219 tailored to animal size—with a pouch to hold the logger and facilitate easy removal for data  
220 download and subsequent reattachment.

221 Savannah Tracker GPS loggers (Savannah Tracking Ltd, Kilifi, Kenya) are designed for wildlife  
222 and livestock monitoring. Both the battery and GPS unit are affixed to a canvas collar, and the  
223 battery system is equipped with a non-rechargeable 1D battery. These GPS loggers use the  
224 Iridium satellite system for data communication, enabling precise tracking of movements even in  
225 remote and challenging terrains. Their design allows the loggers to endure harsh environmental  
226 conditions, including extreme temperatures and exposure to water, ensuring the dependable  
227 collection of field data. Battery life is generally long, but depends on the selected sampling interval.  
228 For example, when configured with 30-minute intervals, 24 hours of active GPS tracking per day,  
229 a 30-second time-to-position lock (GPS time out), and a 24-hour interval for data reporting, the  
230 estimated battery life is approximately 335 days for the 1D cell. A comprehensive data  
231 management software package is provided, facilitating various functions such as general queries,  
232 integration of auxiliary information, and remote data downloads in CSV, KMZ, and SHP formats.

233 Prior to deployment, both the CatLog2 and Savanna GPS loggers required activation and  
234 configuration of the GPS fix rates. In addition, the Savanna GPS logger offered the capability of  
235 remote adjustment of its GPS fix rate.

### 236 **GPS fix rate**

237 Our selection of the GPS fix rate was influenced by device specifications, expert guidance, and  
238 the study's duration. We aimed to deploy the GPS devices for 12 to 15 months to capture seasonal  
239 variations in livestock movements between the rainy and dry seasons. In seeking expert advice,  
240 we consulted with researchers experienced in the use of GPS loggers in similar research  
241 contexts. We opted for 30-minute intervals as this would preserve battery life, ensuring that the  
242 Savannah Tracker batteries could sustain the study period lasting 12 to 15 months.

243 As part of the quality assessment of the position data, we calculated the fix success rate by  
244 dividing the number of recorded fixes by the total number of scheduled fixes, for data collected  
245 during July and August 2023.

246 The Savannah Tracker devices have the GPS timeout and “retry” configuration settings, where it  
247 retries taking a position every 90 seconds until it is successful. This is important considering the  
248 movement of the animals through the shrubs and under the forest canopy, which blocks the  
249 device's access to satellite view. Additionally, the CatLog GPS logger offers speed-triggered  
250 interval adjustment.

### 251 **Study 3: schistosomiasis exposure in Mangochi, Malawi**

#### 252 **Background and setting**

253 Authors Russell Stothard and Janelisa Musaya are the lead investigators for this study,  
254 collaborating with authors Alexandra Juhasz and Peter Makaula. The primary aim is to investigate  
255 hybridization in human schistosomes arising from close contact with animal schistosomes.

256 Principally a closed prospective cohort study of humans with environmental surveillance of  
257 freshwater intermediate snails, this project additionally allocated significant research effort  
258 towards investigating the putative zoonotic spillover of schistosomiasis into local livestock. This  
259 brings together a multidisciplinary team inclusive of various stakeholders engaged in cattle  
260 farming and husbandry. Set within a One Health approach, a key focus is upon estimating cattle  
261 water contact points and immersion times along this shoreline (see [www.lstmed.ac.uk/hugs](http://www.lstmed.ac.uk/hugs)) to  
262 quantify transmission of *Schistosoma haematobium* and *Schistosoma mattheei* along Lake  
263 Malawi, Mangochi District within a calendar year. Data were collected from April to December of  
264 2022.

### 265 **Sampling strategy**

266 The primary goal of the GPS datalogging sub-study was to estimate water contact events. We  
267 targeted a small cattle herd of 8 animals in which a hybrid schistosome was confirmed. Over a  
268 three-month period the movement of each animal was estimated. The data were analyzed to  
269 obtain a cartographic representation of the comparative dispersion of animals, and water  
270 immersion times, as a broad estimation of transmission (Juhasz et al. *in preparation*).

271 This cattle herd was kept each night in a household kraal. The movements of these eight animals  
272 were recorded from May 2022 to July 2022. Given the small herd size and its composition of  
273 calves and adults, all animals were tracked to give an estimation of water contact immersion times  
274 for each animal.

### 275 **GPS devices and fix rate**

276 The GPS trackers we used were adapted from dementia care technologies  
277 (<https://www.techsilver.co.uk/product/satellite-gps-tracker/>). This is a satellite-based system that  
278 does not require a mobile signal to locate the animal quickly and easily. It provides regular updates  
279 on any detected movement of the herd and  
280 alerts a mobile phone with updates every 5  
281 minutes. It is possible to subscribe for location  
282 fixes every 2 minutes but this increases  
283 subscription costs and reduces battery life.  
284 The GPS tracker is small (H 6.83 cm x W 5.13  
285 cm x D 2.14 cm) and lightweight (90g with  
286 batteries). It uses four AAA batteries and if the  
287 battery power is low, a warning alert gives 2-3  
288 days notice.

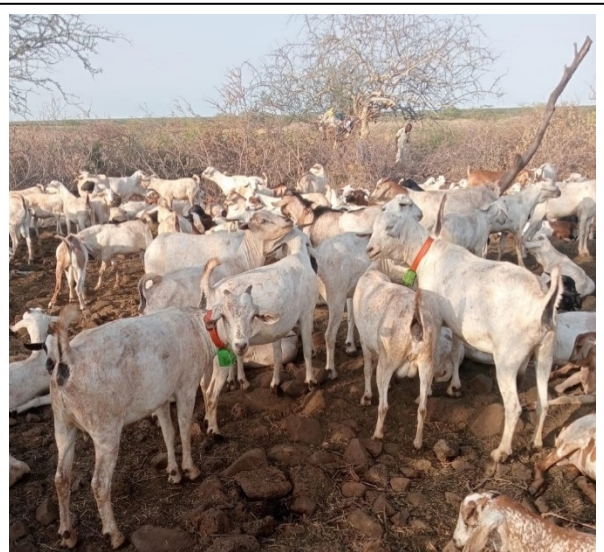

Figure 1: Goats in Marsabit wearing FindMy collars

289 To fit the GPS unit to each animal, a nylon collar with plastic buckle and cross-stitched cradle for  
290 were bought from Amazon. The nylon fabric uses high-density webbing to increase durability and  
291 the quick release buckle was made of sturdy plastic, which is lighter than metal buckles and was  
292 more comfortable to wear. Before we put the GPS tracker in the cradle, we wrapped a moisture-  
293 wicking material around it and put it in a plastic bag. Each GPS collar and tracker was marked  
294 with white paint with the Roman numerals (I-VIII).

## 295 **ETHICAL APPROVALS**

296 Ethical approval and Animal Care and Use committee approval was obtained from relevant  
297 authorities in the US, UK, Kenya, and Malawi. Informed consent was documented in writing and  
298 witnessed in all three studies. Special attention was given to the attachment and use of GPS  
299 devices on animals to minimize discomfort and avoid harm; devices were lightweight and non-  
300 invasive, ensuring little interference with the animals' natural behavior.

## 301 **RESULTS**

### 302 **Study 1: human-animal contact networks in Marsabit, Kenya.**

#### 303 **FindMy**

304 We found these devices were easy to put on, and while a bit more difficult to remove, this reflected  
305 the security of the fastener. The plastic collar was pliable and lightweight, and appeared  
306 comfortable to the animals. One device broke when it was kicked by another animal, but the  
307 remaining 17 devices were intact and functioning at the end of the sampling period. A photo of  
308 these collars is presented in Figure 1.

309 Accuracy was estimated to be 19 meters, evaluated by calculating the positional error over 20  
310 fixes compared to a handheld GPS device. Mean precision was 6.51 meters (range 0.5, 16.6)  
311 over the same 20 fixes. From the app, a total of 3,186 successful fixes were obtained,  
312 corresponding to a mean fix rate of 2.31 fixes/day, or a 41% fix rate success. From on-board  
313 storage, a total of 7,244 successful fixes were obtained, corresponding to a mean fix rate of 4.19  
314 fixes/day, or an 83.7% fix rate. The missing fixes were all from the 01:00 fix time. We did not  
315 detect any implausible fixes, defined as fixes located outside of the subcounty. Observed battery  
316 life matched that expected.

#### 317 **Digitanimal**



318 We found these devices were sturdy but complicated to attach to the animal. Both our study team  
319 and the community felt the device combined with the counterweight was too heavy for sheep and  
320 goats, particularly as the drought had weakened livestock in  
321 this region. Thus, we only applied these devices to cattle  
322 and camels. A photo of these collars is presented in Figure  
323 2.

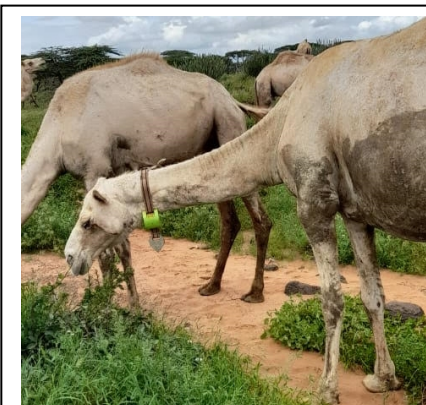

Figure 2: Camel in Marsabit wearing a Digital collar

324 None of the SigFox devices worked in Marsabit. Of the 10  
325 GSM devices, three stopped working between March and  
326 May of 2023. From the remaining seven GSM devices,  
327 accuracy was estimated to be 67 meters, estimated from  
328 294 fixes. Mean precision was 94 meters (range 0, 943). A total of 10,794 successful fixes were  
329 obtained, corresponding to a mean fix rate of 31.1 fixes/day, or a 64% fix rate success for the  
330 devices that were still functioning. We did not detect any implausible fixes. Batteries lasted just  
331 under 6 months.

### 332 **FarmRanger**

333 We found that community members were enthusiastic  
334 about the design and appearance of these devices. For  
335 livestock keepers based in Africa wishing to collar their  
336 own animals, these devices are easy to ship within  
337 Africa, and can be recharged in the same way as a  
338 mobile phone. A photo of these collars is presented in  
339 Figure 3

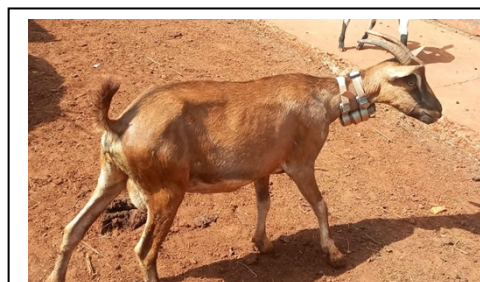

Figure 3: Goat in Marsabit wearing a FarmRanger collar

340 Accuracy was estimated to be 22 meters, from 18 fixes, and mean precision was 15.23 meters  
341 (range 0, 81). A total of 23,065 successful fixes were obtained, corresponding to a mean fix rate



342 of 35.9 fixes/day, or a 74.7% fix rate success. We did not detect any implausible fixes. Batteries  
343 lasted just under 4 weeks, significantly shorter than expected for fixes every 30 minutes.

## 344 **Study 2: Brucellosis and MERS-CoV study.**

### 345 **Savannah Tracker**

346 Affixing the Savannah Tracker GPS logger was straightforward due to its adjustable neck collar.

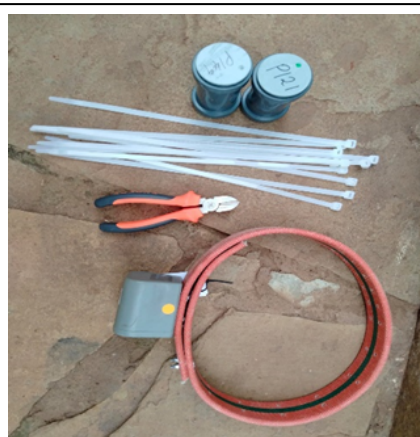

347  
348  
349  
350  
351  
352  
353  
354  
355  
Figure 4: CatLog2 GPS logger (top) and Savannah GPS logger (bottom), with the items used for affixing the loggers.

347 When restraining an animal, the collar was secured using  
348 flat washers and nuts, tailored to the animal's neck girth.  
349 Care was taken to ensure it was neither too tight, causing  
350 discomfort, nor too loose, which could result in  
351 entanglement in stumps or tree branches during grazing.  
352 The collars exceeded the neck girth of the livestock, and  
353 any excess collar material was secured with plastic zip-ties  
354 to prevent skin irritation.

355 Out of the 20 Savannah Tracker devices deployed on  
356 animals at the two study sites, two instances occurred where herders removed the devices. In  
357 one case, it was due to perceived discomfort to the animals, but the study team addressed this  
358 by resizing and redeploying the collar. In the second case, the household removed the device  
359 when they decided to de-stock the animal, subsequently contacting the study team for further  
360 action. Fix rate success was 99.7%.

### 361 **CatLog2 GPS logger**

362 For the CatLog2 GPS loggers, locally crafted collars were fashioned from animal leather, with  
363 sizes tailored for goats, sheep, cattle, and camels. These collars featured an integrated pouch  
364 designed to safeguard the devices against physical  
365 damage during the animals' grazing activities. The  
366 attachment of CatLog2 GPS devices was facilitated by  
367 the use of zip-ties, which were secured around the  
368 pouch to affix the device firmly to the collar.

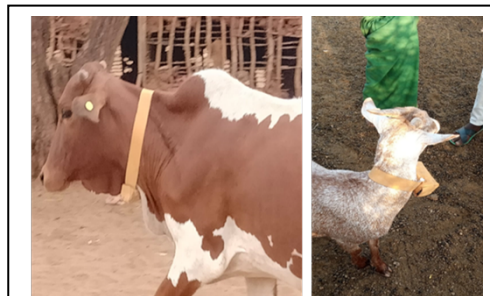

Figure 5: CatLog 2 GPS collar on a bovine (left) and goat (right)

369 Throughout the study, there were five instances in which  
370 CatLog2 devices became detached from animals, primarily camels and cattle. Two cases were  
371 due to wildlife attacks of livestock. The study team promptly reattached the devices to  
372 other animals within the same herds. The design of the GPS tracker and battery attachment left  
373 room for wire breakage during vigorous shaking, a situation that can arise when large-bodied  
374 animals engage in fights. In one instance, both the GPS tracker and batteries had to be replaced,  
375 while in another case, only the batteries required replacement. Fix rate success was 98.9%.

### 376 **Study 3: schistosomiasis exposure in Mangochi, Malawi**

377 This satellite GPS tracker was ideal for tracking animals in rural areas, in close contact with  
378 humans. It caused minimal discomfort and did not change the animals' behavior. Cattle in this  
379 setting are in regular contact with their owners, with their movements broadly controlled by a  
380 herder who is responsible for grazing and watering the animals under his supervision. Every  
381 second week, owners had to change the batteries, and without their help we would not have been  
382 able to do this study. In addition to the labor required to change batteries, our nylon straps started  
383 to fail as animals caught the material on trees and barbed wire fencing.

384 The manufacturer guaranteed their waterproofing, to a depth of 1m for up to 30 minutes.  
385 Nevertheless, the GPS tracking devices were not fully waterproof. If the animal stayed in the water  
386 for a long time, the moisture penetrated the device and caused false distances.

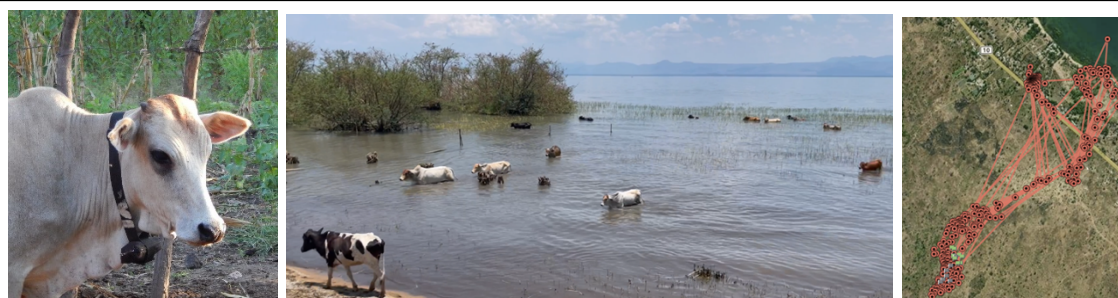

Figure 6: Cattle in Malawi wearing a satellite GPS collar (left) and cattle in water browsing on emergent vegetation often fully immersing the GPS device each day (middle) and plot of cattle movements over a 2-day period (right).

## 387 **DISCUSSION**

388 Two studies (Study #1 and Study #2) were conducted among pastoralist livestock keepers in  
389 northern Kenya. This setting is characterized by spatiotemporal uncertainty in resource  
390 distribution, which pastoralist systems manage through seasonal movement.

391 In Study #1 we found that SigFox satellite coverage was not sufficient in Marsabit for the  
392 DigitAnimal SigFox devices to work. Reliability was also poor for the DigitAnimal GSM (mobile  
393 phone network) devices: several devices stopped working entirely, and the others had a low rate  
394 of successful fixes. This may reflect the setting itself, rather than the quality of the devices: we  
395 encourage other researchers to purchase 1-2 of the devices they plan to use to pilot them in their  
396 study setting. We found that acceptability was low due to the difficulty in attaching the collar, and  
397 the device's weight, particularly for sheep and goats. Both the FarmRanger and FindMy devices  
398 were well-received. The FindMy devices had a much better battery life than FarmRanger, but  
399 FarmRanger devices are half as expensive, are easy to recharge, and can be easily shipped  
400 within Africa for farmers who wish to use them to track their own livestock. FarmRanger had a  
401 high fix rate success without need for collar retrieval to download data; FindMy had a low fix rate

402 success for the app-based data, but a high fix rate success for the data stored on-board, which  
403 require collar retrieval to access. The app-based data were sufficient to use these to find the  
404 collars for retrieval and data download. As for DigitAnimal, this may reflect the setting rather than  
405 the device. Costs scale with the number of units purchased; we purchased between 10  
406 (FarmRanger) and 20 (DigitAnimal) devices for \$125-\$260 per device, being the least expensive  
407 for FarmRanger, and the most expensive for FindMy. Precision and accuracy were sufficient for  
408 all three devices for our research questions, and all three devices were found to be extremely  
409 sturdy. Data collection has recently concluded, and analyses are currently being conducted.

410 In Study #2, we found the Savannah Tracker was extremely robust, accurate, and reliable,  
411 however the significant cost of these trackers (~\$1400) means they are most useful when the  
412 study objectives can be met with only a few animals tracked at one time. This can mean a small  
413 number of animals is tracked continuously, or a small number of collars are rotated between  
414 several (or many) animals. The CatLog2 tracker, by contrast, is far less costly (\$100), but data  
415 must be manually retrieved, though battery replacement and data retrieval can be done at the  
416 same time. The Savannah Tracker was more sturdy than CatLog2, but CatLog2 still performed  
417 well in this regard. Both the Savannah Tracker and CatLog2 tracker had much higher fix rate  
418 success than the DigitAnimal, FindMy, or FarmRanger. Data collection is ongoing, and no  
419 analyses have been conducted yet.

420 Study #3 was conducted among subsistence farmers in Malawi, with cattle being moved to  
421 grazing and watering sites daily, and returning home each evening. This setting is more amenable  
422 to devices that require more frequent battery changes or manual data retrieval, and cellular  
423 network coverage is generally better. Of note, these devices were not manufactured for use on  
424 livestock and while they are fairly sturdy, they did not hold up as well as the other five devices  
425 discussed. Nonetheless, the observed geospatial tracks provide new insights into daily and  
426 seasonal cattle water contact patterns in Lake Malawi. These will be discussed in more detail in

427 a subsequent publication; broadly, we found that during the dry season, animals spend up to 45  
428 minutes immersed in shoreline water and frequently go into deep water to forage on emergent  
429 vegetation. We also found that the spatial patterns of livestock schistosomiasis transmission  
430 closely overlap with that of human urogenital schistosomiasis, indicating that livestock  
431 contaminate coastal waters and infect freshwater snails, which in turn infect humans who directly  
432 use lake water. Fully-assembled in the nylon collar and housing, these devices cost £162 each  
433 and have played crucial role in understanding the spatial epidemiology of bovine schistosomiasis  
434 and zoonotic spillover potentials

435 Livestock GPS tracking is increasing in popularity due to the growing availability of both devices,  
436 and analytic methods to analyze the data that result. While the iGot-U device has been extremely  
437 popular historically, it is increasingly less available, leaving researchers to navigate the many  
438 dozens (if not hundreds) of other options available. To assist other researchers interested in using  
439 these technologies we summarize our experiences with six devices here, linked to each study's  
440 setting and objectives. With the exception of the Savannah Tracker, all of these devices cost at  
441 or under \$250 per unit, making them accessible to research projects with a range of budgets. As  
442 the availability and functionality of livestock GPS technologies are likely to evolve rapidly, an  
443 important future direction is a platform or database where users can share their experiences with  
444 livestock GPS technologies for public health research. In selection of appropriate GPS devices  
445 for livestock tracking for public health research, we propose that researchers consider the cost of  
446 device, ease of application, retrieval of data, durability and battery life guided by the study setting.

447 Based on our findings, future research should focus on developing GPS devices with enhanced  
448 data transmission capabilities in low network areas and creating cost-effective solutions for  
449 widespread adoption. Collaborative efforts between technology developers, public health  
450 researchers, and local communities could lead to innovations that address the current limitations  
451 and widen the scope of GPS technology in livestock tracking for public health research.

## 452 REFERENCES

- 453 1. Paz-Kagan T, Alexandroff V, Ungar ED. Detection of goat herding impact on vegetation  
454 cover change using multi-season, multi-herd tracking and satellite imagery. *Science of*  
455 *The Total Environment*. 2023 Oct;895:164830.
- 456 2. Yang A, Boughton RK, Miller RS, Wight B, Anderson WM, Beasley JC, et al. Spatial  
457 variation in direct and indirect contact rates at the wildlife-livestock interface for informing  
458 disease management. *Prev Vet Med*. 2021 Sep 1;194.
- 459 3. Motta P, Porphyre T, Hamman SM, Morgan KL, Ngwa VN, Tanya VN, et al. Cattle  
460 transhumance and agropastoral nomadic herding practices in Central Cameroon. *BMC*  
461 *Vet Res*. 2018 Jul 3;14(1).
- 462 4. Kim Y, Métras R, Dommergues L, Youssouffi C, Combo S, Le Godais G, et al. The role of  
463 livestock movements in the spread of rift valley fever virus in animals and humans in  
464 Mayotte, 2018–19. *PLoS Negl Trop Dis*. 2021 Mar 1;15(3).
- 465 5. Van Damme I, Pray I, Mwape KE, Trevisan C, Coudenys F, Mubanga C, et al.  
466 Movements of free-range pigs in rural communities in Zambia: an explorative study  
467 towards future ring interventions for the control of *Taenia solium*. *Parasit Vectors*. 2022  
468 Dec 1;15(1).
- 469 6. Mosomtai G, Evander M, Mundia C, Sandström P, Ahlm C, Hassan OA, et al. Datasets  
470 for mapping pastoralist movement patterns and risk zones of Rift Valley fever occurrence.  
471 *Data Brief*. 2018 Feb 1;16:762–70.
- 472 7. Floyd JR, Kwoba E, Mwangi T, Okotto-Okotto J, Wanza P, Wardrop N, et al. A  
473 spatiotemporal analysis of cattle herd movement in relation to drinking-water sources:

- 474 implications for Cryptosporidium control in rural Kenya. Environmental Science and  
475 Pollution Research. 2022 May 1;29(23):34314–24.
- 476 8. Triguero-Ocaña R, Martínez-López B, Vicente J, Barasona JA, Martínez-Guijosa J,  
477 Acevedo P. Dynamic network of interactions in the wildlife-livestock interface in  
478 mediterranean spain: An epidemiological point of view. Pathogens. 2020 Feb 1;9(2).
- 479 9. Bailey DW, Trotter MG, Knight CW, Thomas MG. Use of GPS tracking collars and  
480 accelerometers for rangeland livestock production research. Transl Anim Sci. 2018 Feb  
481 1;2(1):81–8.
- 482 10. McGranahan DA, Geaumont B, Spiess JW. Assessment of a livestock GPS collar based  
483 on an open-source datalogger informs best practices for logging intensity. Ecol Evol.  
484 2018 Jun 1;8(11):5649–60.
- 485
